# Supplementary figures and images for: Soy and Frequent Dairy Consumption with Subsequent Equol Production Reveals Decreased Gut Health in a Cohort of Healthy Puerto Rican Women
Source: MDPI journal article supplement (doi:10.3390/ijerph18168254), 2021-08-04

**A**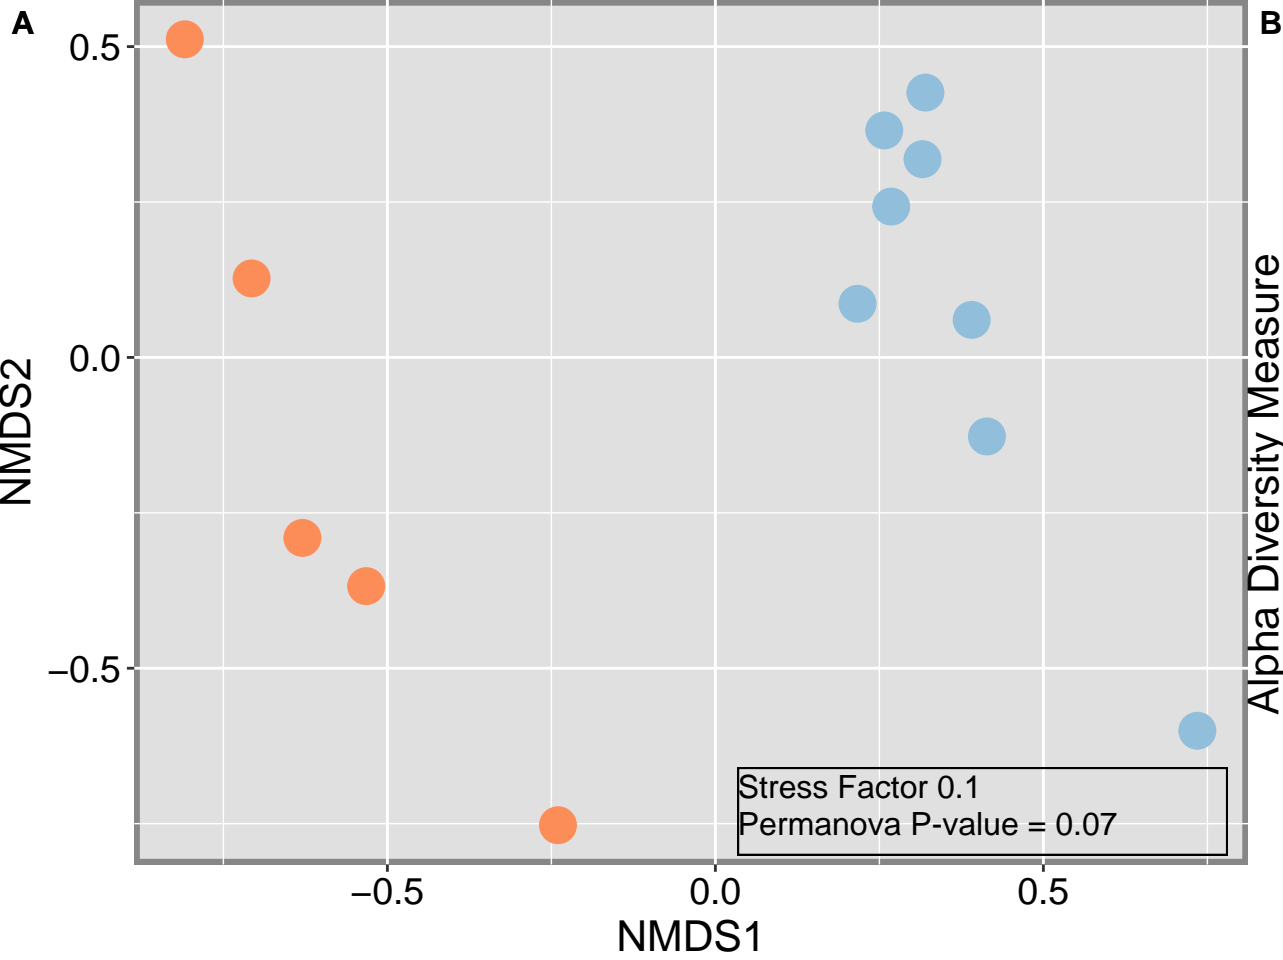**B**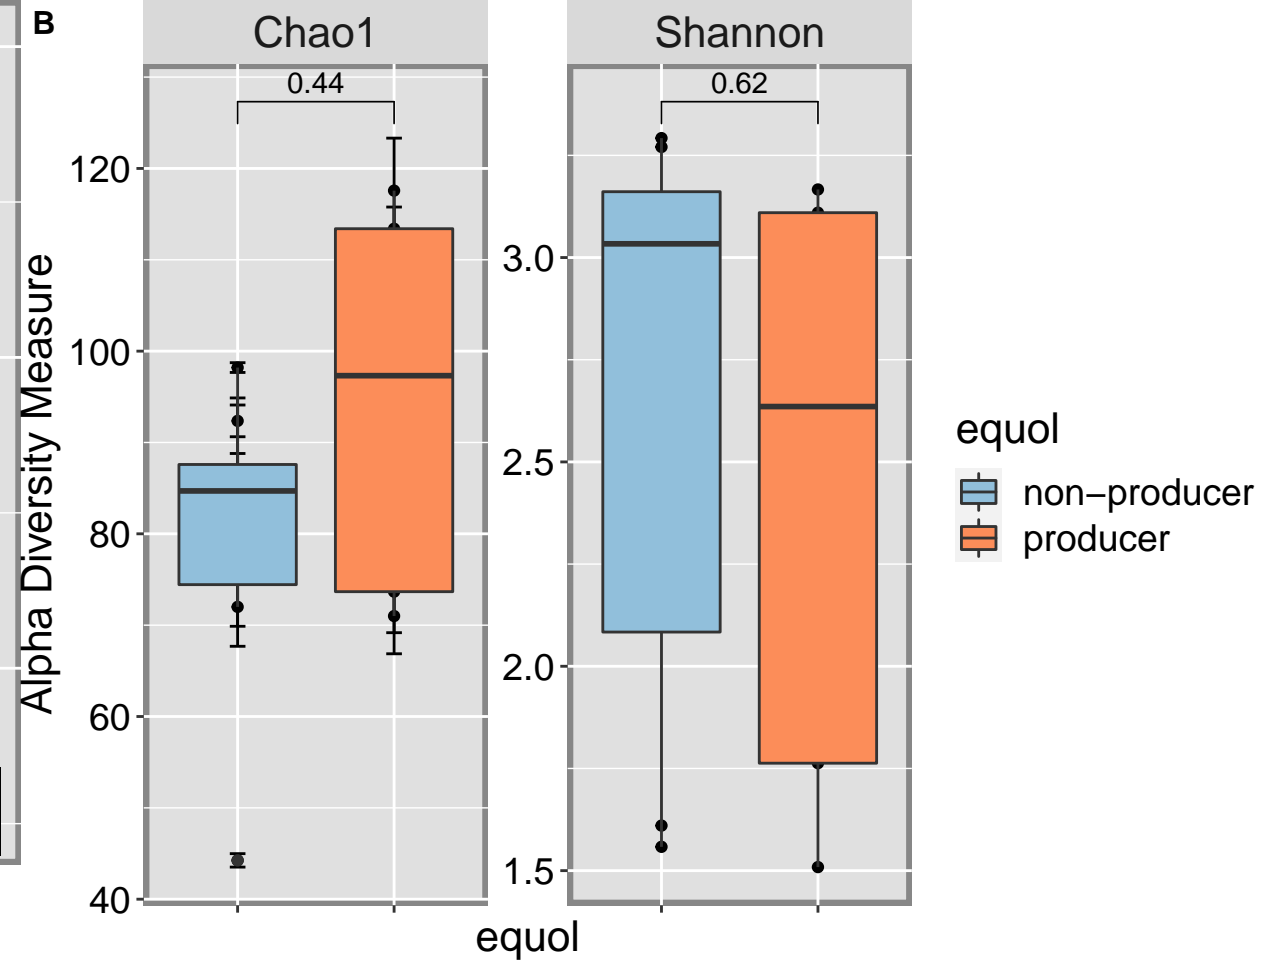

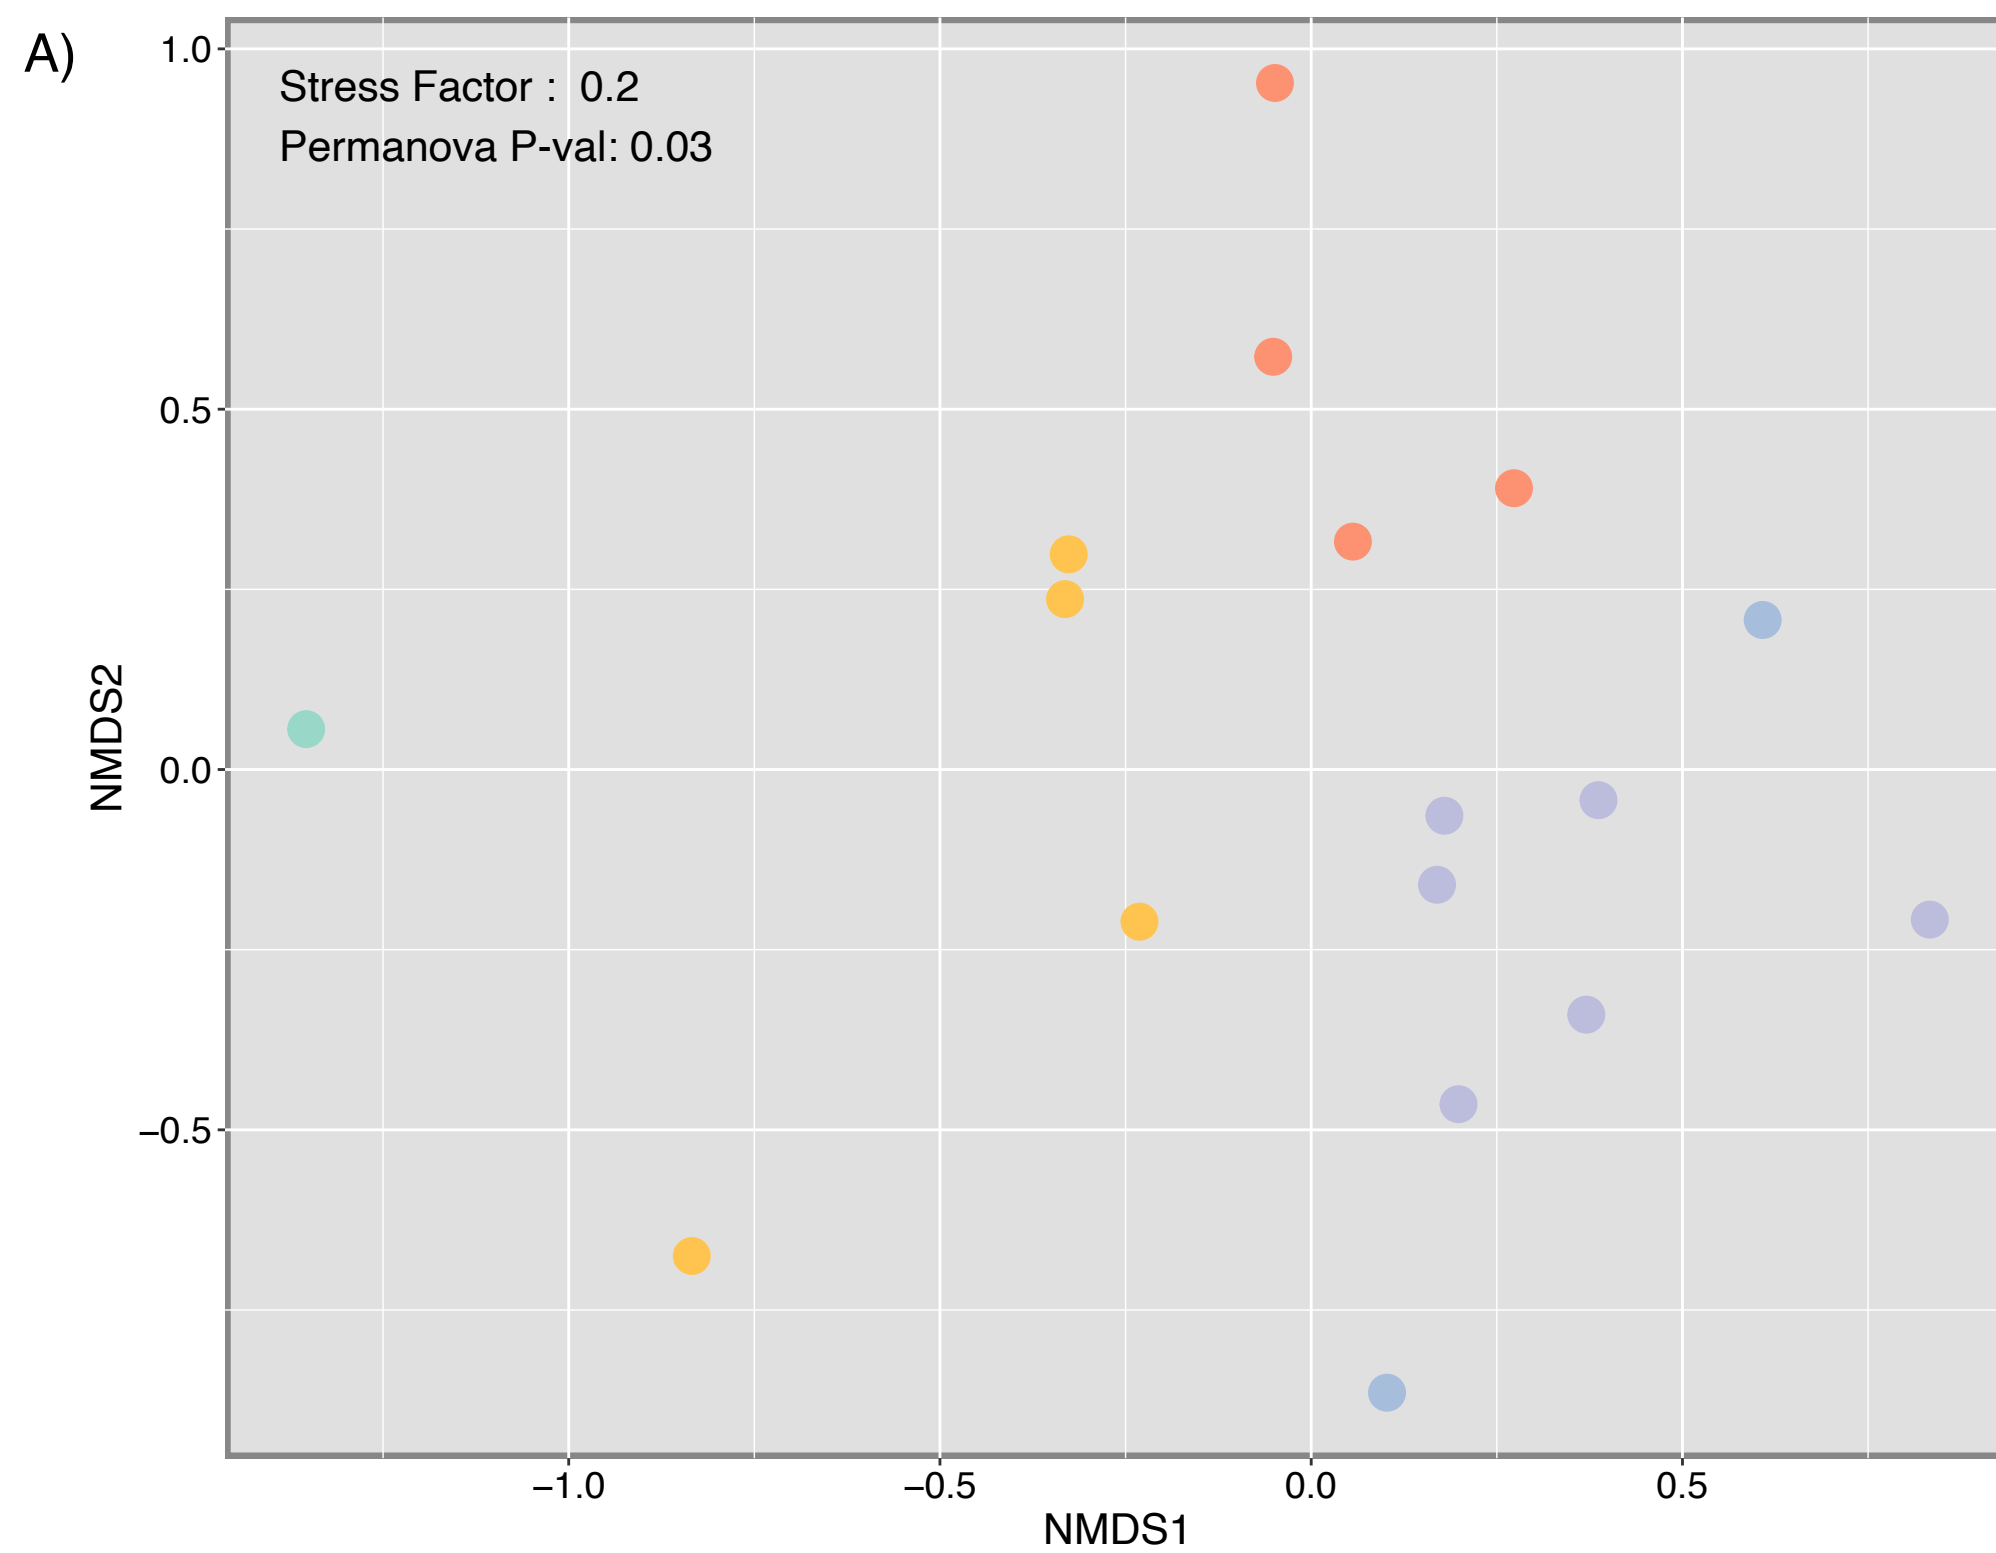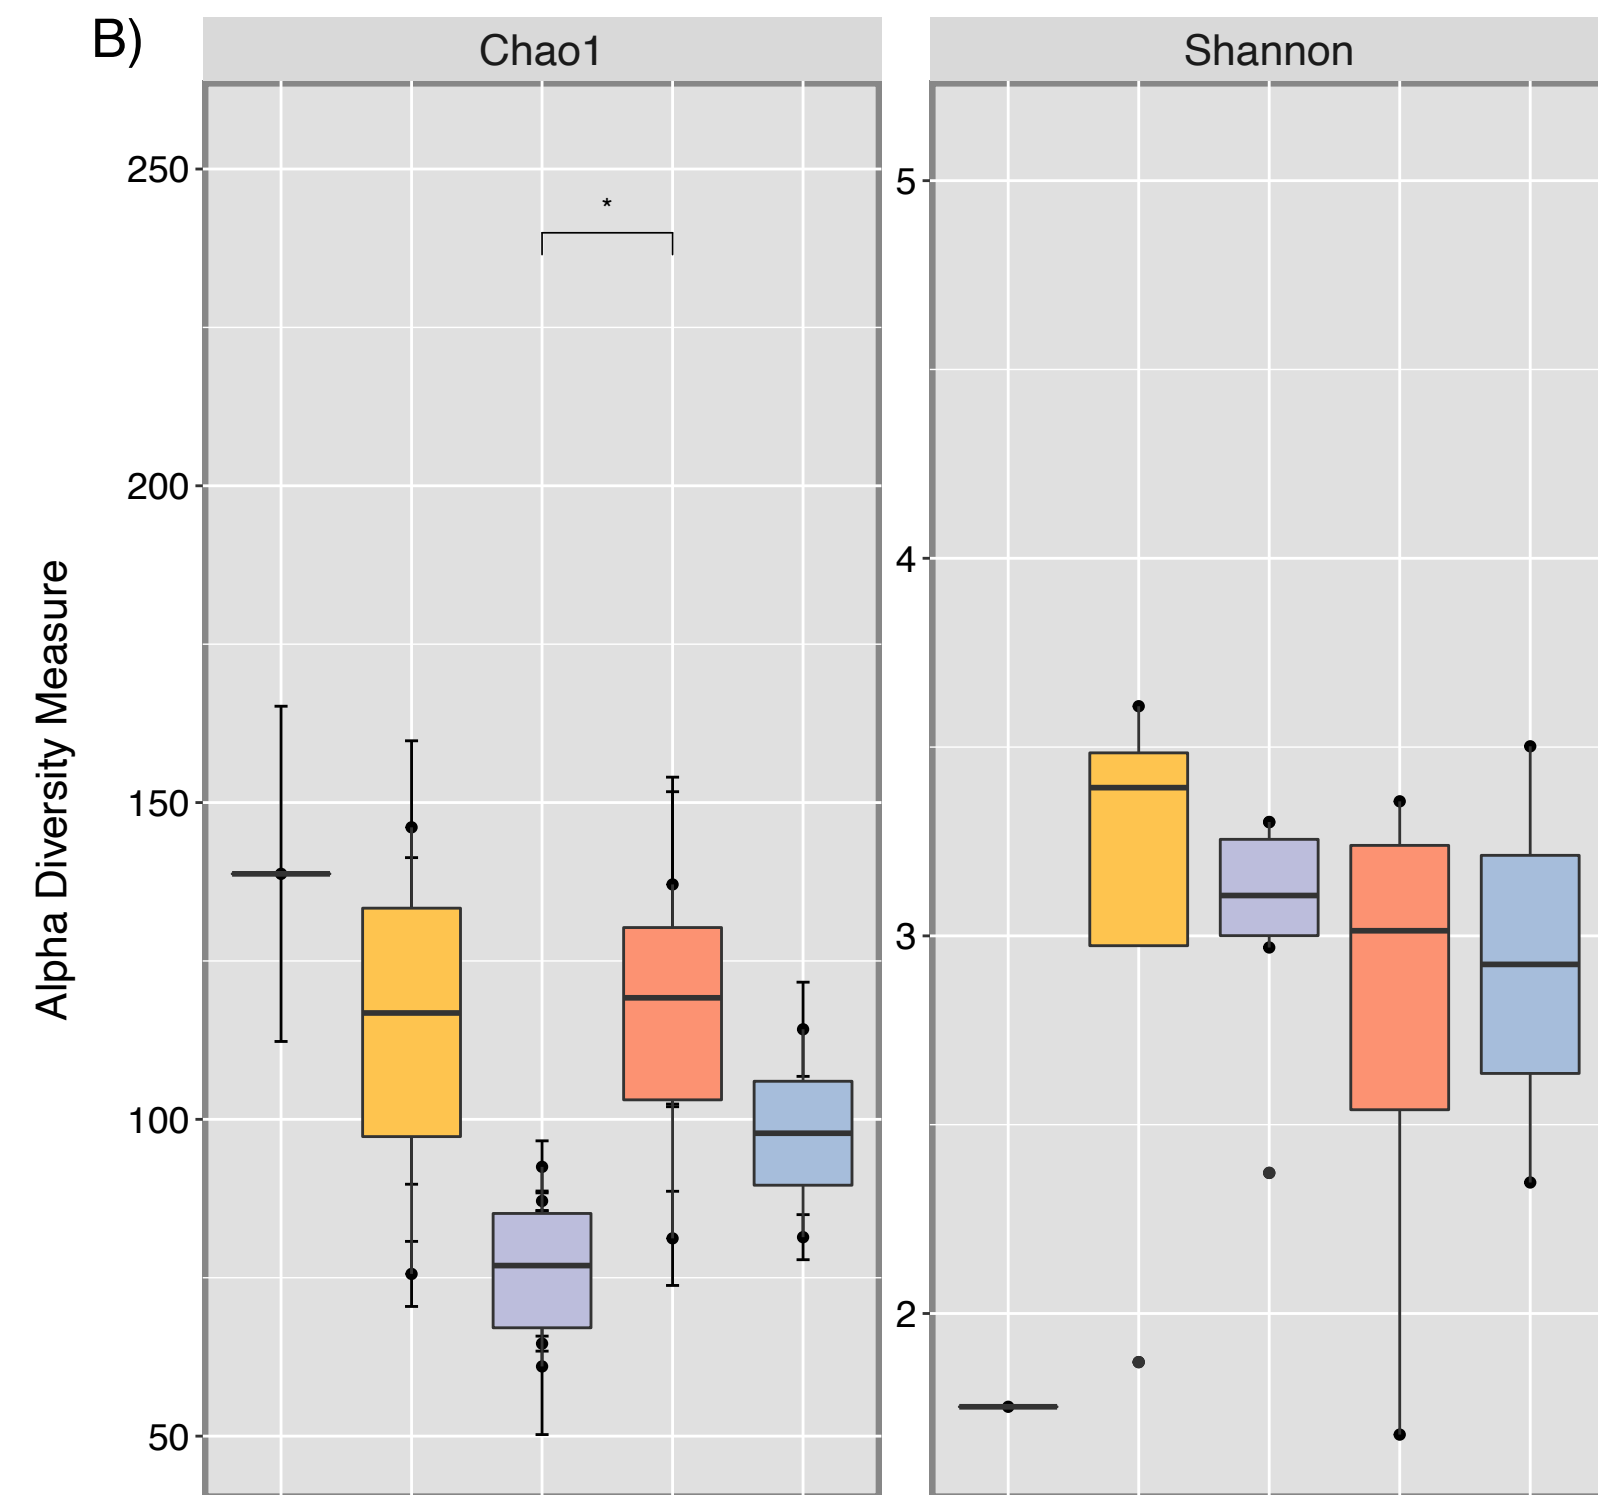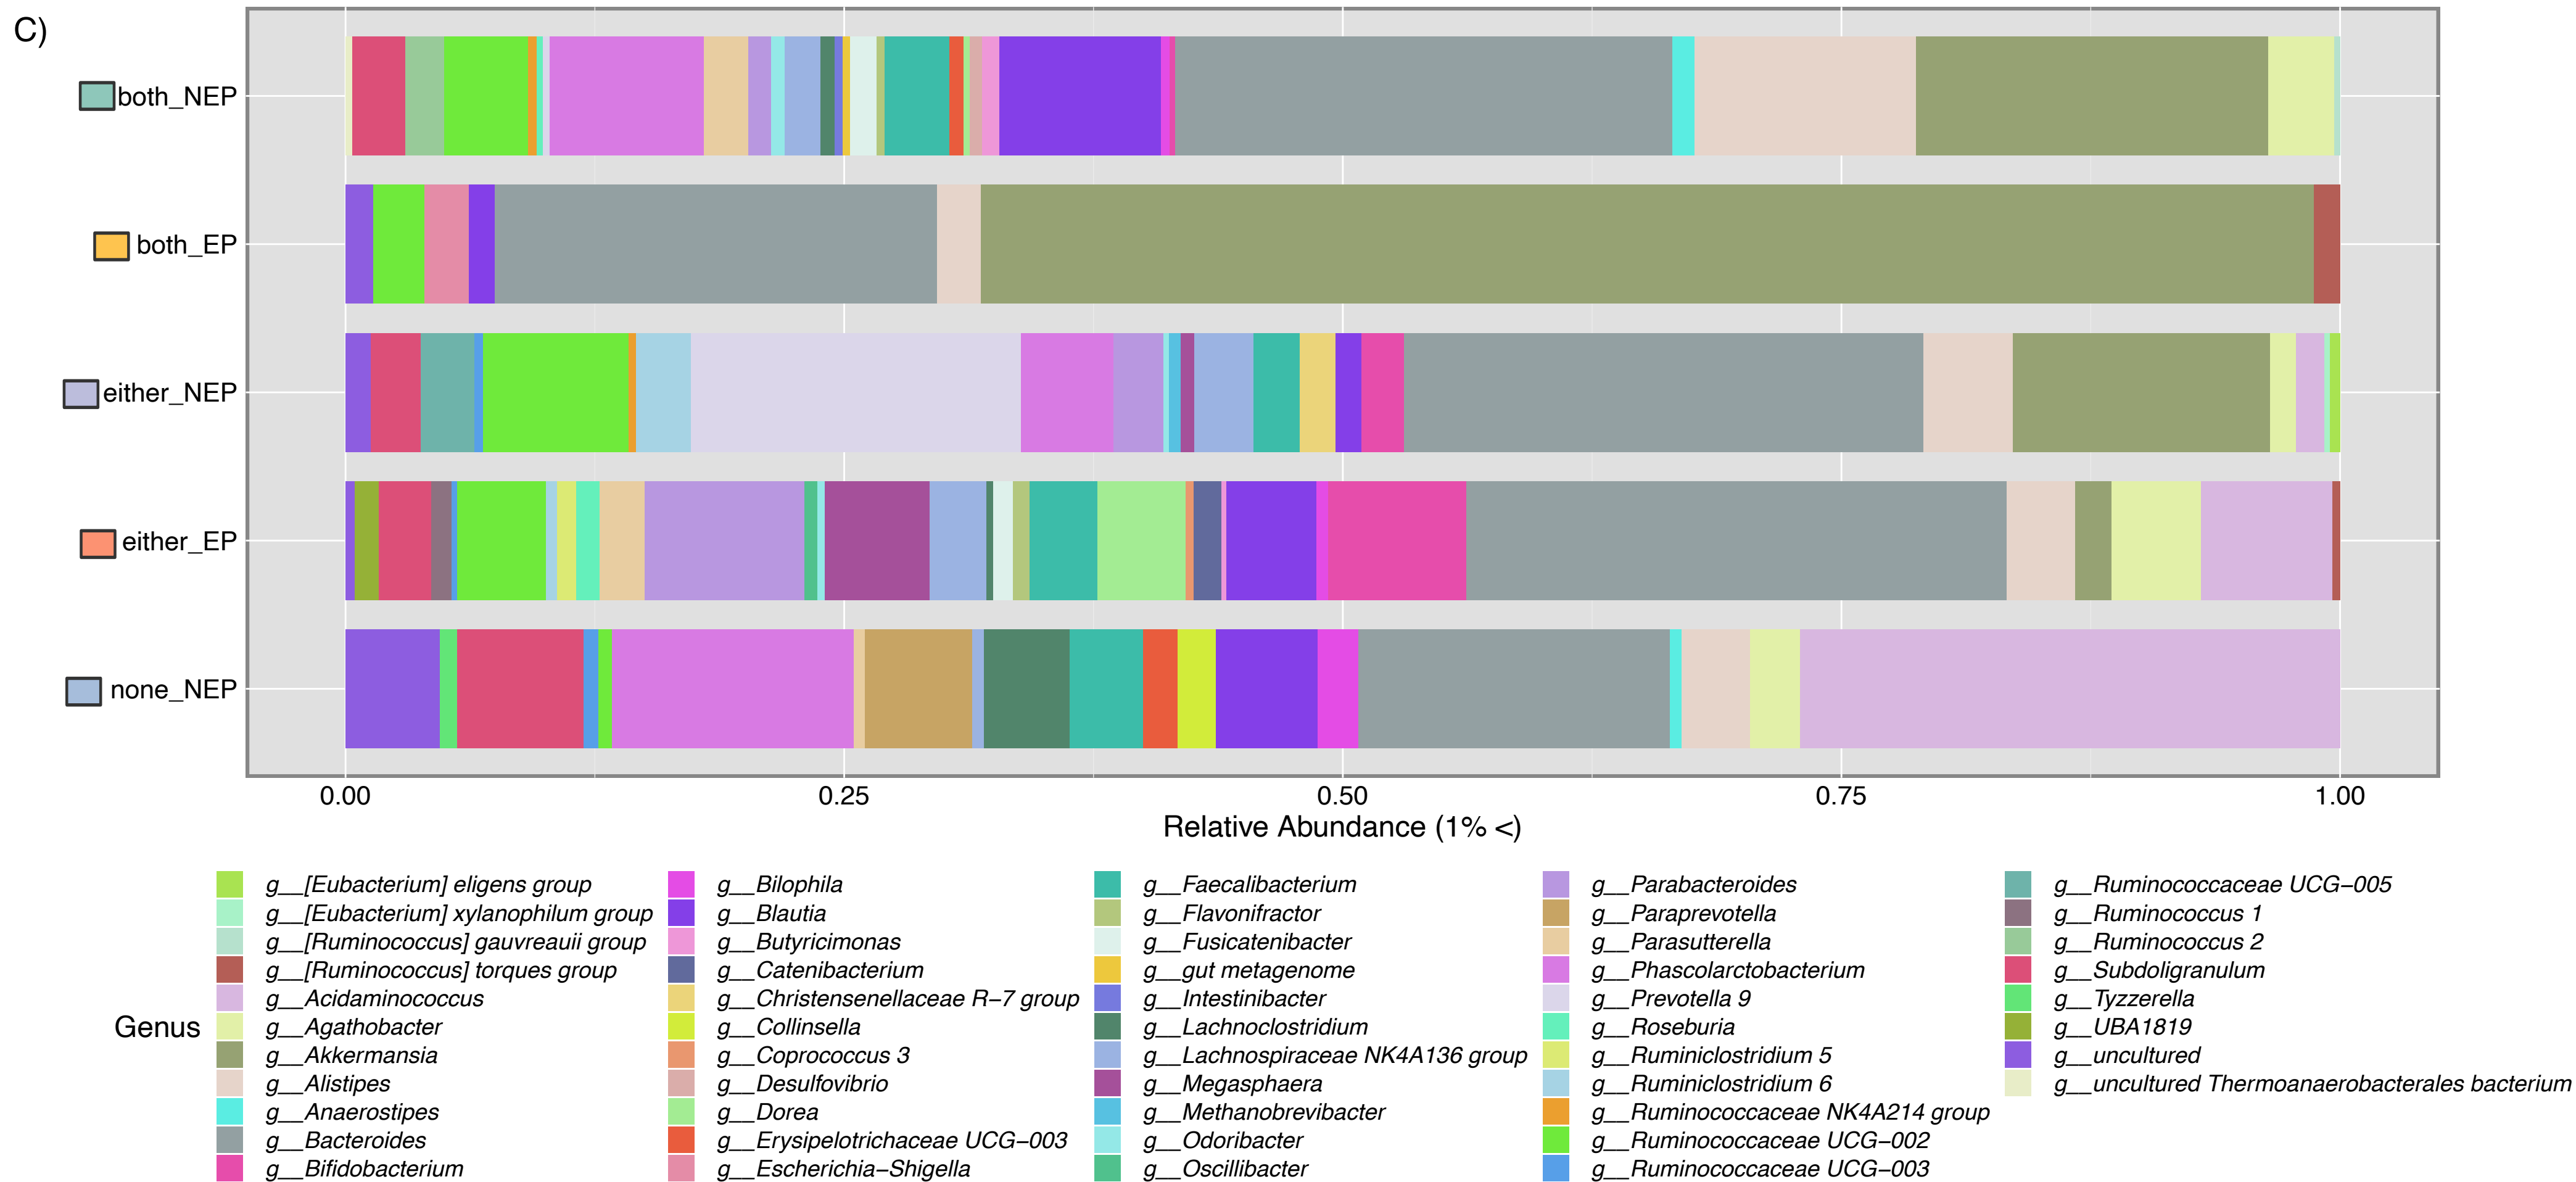

Supplement: s1 [file s1]
